# Supplementary material for: Superior sodium-ion storage performance of Co3O4@nitrogen-doped carbon: derived from a metal–organic framework
Source: Royal Society of Chemistry journal article supplement (doi:10.1039/c6ta00236f), 2016-01-01
Supplement: c6ta00236f1.pdf [file c6ta00236f1.pdf]

## Supporting Information

### Superior sodium-ion storage performance of $\text{Co}_3\text{O}_4$ @Nitrogen-doped carbon: Derived from a metal-organic framework

Ying Wang, Caiyun Wang, Yijing Wang,\* Huakun Liu, and Zhenguo Huang\*

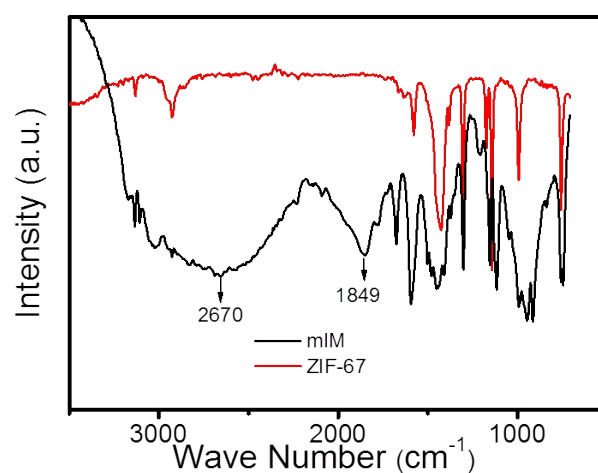

**Fig. S1.** FTIR spectra of 2-methylimidazole (mIM) raw material and the obtained ZIF-67. Due to the coordination between  $\text{Co}^{2+}$  and mIM, the typical bands of mIM at 2670  $\text{cm}^{-1}$  (associated with  $\text{N-H}\cdots\text{N}$  hydrogen bonding) and 1849  $\text{cm}^{-1}$  (between  $\text{N-H}\cdots\text{N}$  out-of-plane bending and the N-H stretching peaks) disappear in ZIF-67.

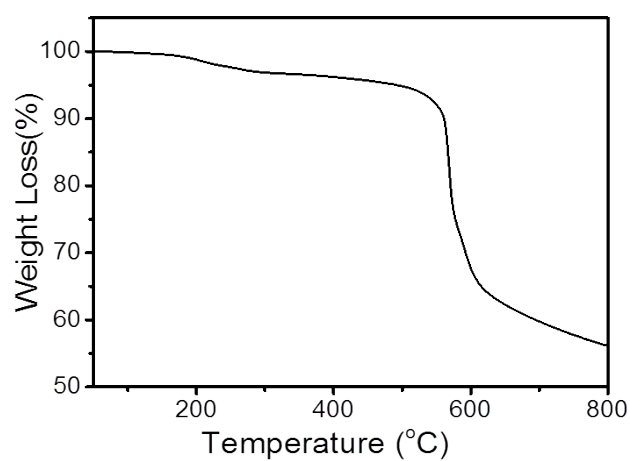

**Fig. S2.** TGA plot of the ZIF-67 precursor. TGA was carried out in Ar with a heating rate of  $10\text{ }^{\circ}\text{C min}^{-1}$ .

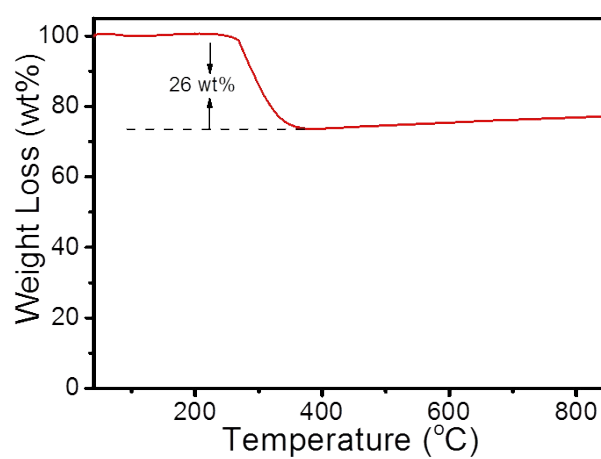

**Fig. S3.** TGA plot of the as-obtained  $\text{Co}_3\text{O}_4@\text{NC}$ . TGA was carried out in air with a heating rate of  $10\text{ }^{\circ}\text{C min}^{-1}$ .

**Table S1** Elements content of the  $\text{Co}_3\text{O}_4@\text{NC}$  sample

| Element       | Co | C  | N |
|---------------|----|----|---|
| Content (wt%) | 54 | 22 | 4 |

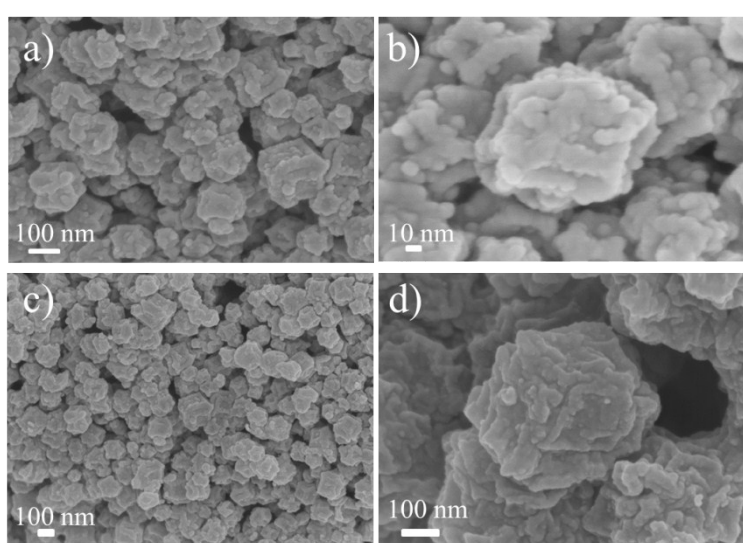

**Fig. S4.** SEM images of (a, b) the  $\text{Co}@\text{NC}$  intermediate, and (c, d) the pure  $\text{Co}_3\text{O}_4$  at different magnifications.

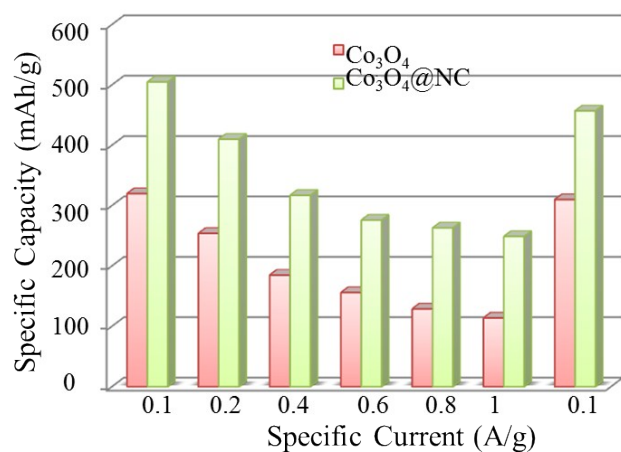

**Fig. S5.** Rate capability comparison of the Co<sub>3</sub>O<sub>4</sub> and Co<sub>3</sub>O<sub>4</sub>@NC electrodes (0.1–1 A·g<sup>-1</sup>).

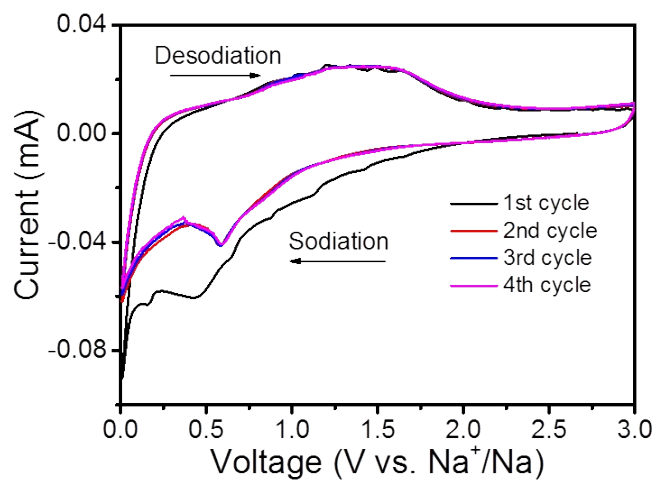

**Fig. S6.** Cyclic voltammograms for the first 4 cycles of the Co<sub>3</sub>O<sub>4</sub>@NC electrode, scanned at 0.1 mV·s<sup>-1</sup>.
